# Supplementary material for: Discovery of a New Polymorph of 5-Methoxy-1H-Indole-2-Carboxylic Acid: Characterization by X-ray Diffraction, Infrared Spectroscopy, and DFT Calculations
Source: MDPI journal article supplement (doi:10.3390/molecules29102201), 2024-05-08
Supplement: s1 [file s1]

---

SUPPLEMENTARY MATERIALS

**Discovery of a New Polymorph of 5-Methoxy-1H-Indole-2-Carboxylic Acid: Characterization by X-Ray Diffraction, Infrared Spectroscopy, and DFT Calculations**

Julia Polak 1, Julia Bąkowicz 2 and Barbara Morzyk-Ociepa 1,\*

1 Institute of Chemistry, Faculty of Science and Technology, Jan Długosz University in Częstochowa, Armii Krajowej 13/15, 42-200 Częstochowa, Poland; juliapolak.05@gmail.com

2 Faculty of Chemistry, Wrocław University of Science and Technology, Wybrzeże Wyspiańskiego 27, 50-370 Wrocław, Poland; julia.bakowicz@pwr.edu.pl

\* Correspondence: bmorzyk-ociepa@o2.pl

## CONTENTS

Table S1. Comparison of crystal data and structure refinement for polymorphs 2 and 1 (this work) of MI2CA.

Table S2. Selected experimental (X-ray) geometrical parameters, including bond lengths [ $\text{\AA}$ ] and bond angles [ $^\circ$ ], with e.s.d. in parentheses, observed in MI2CA polymorph 2, along with the corresponding theoretical parameters calculated for the dimer and trimer of MI2CA using the  $\omega$ B97X-D method with the 6-31++G(d,p) (\*) and aug-cc-pVTZ (\*\*) basis sets.

Figure S1. Correlations between the experimental and theoretical geometrical parameters calculated for dimer using the  $\omega$ B97X-D method and two basis sets: 6-31++G(d,p) and aug-cc-pVTZ.

Figure S2. Correlations between the experimental and theoretical bond lengths calculated for trimer using the  $\omega$ B97X-D method and the 6-31++G(d,p) basis set.

Figure S3. Correlations between the experimental and theoretical bond angles calculated for trimer using the  $\omega$ B97X-D method and the 6-31++G(d,p) basis set.

Table S3. Experimental (FT-IR) and theoretical wavenumbers ( $\tilde{\nu}^a$ ,  $\text{cm}^{-1}$ ), and infrared intensities ( $A^{\text{IR}}$ ,  $\text{km}\cdot\text{mol}^{-1}$ ) calculated for trimer using the  $\omega$ B97X-D method and the 6-31++G(d,p) basis set with band assignments.

Table S4. Selected experimental geometrical parameters, including bond lengths [ $\text{\AA}$ ] and bond angles [ $^\circ$ ], with e.s.d. in parentheses, observed in MI2CA polymorph 1 (this work).

Figure S4. The overall view and labeling of the atoms in two independent molecules (designated as A and B) of polymorph 1 MI2CA. Displacement ellipsoids are drawn at the 50% probability level and H atoms are shown as small spheres of arbitrary radii.

Table S5. Experimental geometrical parameters of intermolecular interactions (distances [ $\text{\AA}$ ] and bond angles [ $^\circ$ ]) in MI2CA polymorph 1.

**Table S1.** Comparison of crystal data and structure refinement for polymorphs 2 and 1 (this work) of MI2CA.

|                                                             | Polymorph 2                                    | Polymorph 1<br>(this work)                     |
|-------------------------------------------------------------|------------------------------------------------|------------------------------------------------|
| Empirical formula                                           | C <sub>10</sub> H <sub>9</sub> NO <sub>3</sub> | C <sub>10</sub> H <sub>9</sub> NO <sub>3</sub> |
| Formula weight                                              | 191.18                                         | 191.18                                         |
| Crystal system                                              | Monoclinic                                     | Monoclinic                                     |
| Space group                                                 | P2 <sub>1</sub> /c                             | C2/c                                           |
| Unit cell dimensions (Å, °)                                 | a = 4.0305(2)                                  | a = 13.0260(4)                                 |
|                                                             | b = 13.0346(6)                                 | b = 7.6923(2)                                  |
|                                                             | c = 17.2042(9)                                 | c = 35.2181(11)                                |
|                                                             | β = 91.871(5)                                  | β = 90.984(3)                                  |
| V (Å <sup>3</sup> )                                         | 903.36(8)                                      | 3528.33(18)                                    |
| Z (molecules/cell)                                          | 4                                              | 16                                             |
| Density calculated (Mg m <sup>-3</sup> )                    | 1.406                                          | 1.440                                          |
| F(000)                                                      | 400                                            | 1600                                           |
| Crystal dimensions (mm)                                     | 0.06 x 0.06 x 0.44                             | 0.50 x 0.50 x 0.05                             |
| Temperature (K)                                             | 298                                            | 298                                            |
| Wavelength (Å)                                              | 0.71073 (Mo Kα)                                | 0.71073 (Mo Kα)                                |
| θ range for data collection (°)                             | 2.0 to 26.0                                    | 2.3 to 26.0                                    |
| Reflections collected                                       | 2891                                           | 6163                                           |
| Reflections independent                                     | 1759                                           | 3478                                           |
| Reflections observed [I > 2σ(I)]                            | 1139                                           | 2826                                           |
| Number of refine parameters                                 | 132                                            | 263                                            |
| R <sub>int</sub>                                            | 0.023                                          | 0.014                                          |
| R [I > 2σ(I)], wR <sub>2</sub> [all], S                     | 0.051, 0.137, 1.06                             | 0.044, 0.110, 1.08                             |
| Δρ <sub>max</sub> and Δρ <sub>min</sub> (eÅ <sup>-3</sup> ) | 0.18, -0.19                                    | 0.16, -0.18                                    |

**Table S2.** Selected experimental (X-ray) geometrical parameters, including bond lengths [Å] and bond angles [°], with e.s.d. in parentheses, observed in MI2CA polymorph 2, along with the corresponding theoretical parameters calculated for the dimer and trimer of MI2CA using the  $\omega$ B97X-D method with the 6-31++G(d,p) (\*) and aug-cc-pVTZ (\*\*) basis sets.

| Bond lengths,<br>Bond angles | Exp.       | Dimer* | Dimer** | Trimer* |       |       |
|------------------------------|------------|--------|---------|---------|-------|-------|
|                              |            | a = b  | a = b   | a       | b     | c     |
| O1-C0                        | 1.225(3)   | 1.236  | 1.228   | 1.236   | 1.237 | 1.216 |
| O2-C0                        | 1.316(3)   | 1.312  | 1.309   | 1.312   | 1.313 | 1.344 |
| O3-C5                        | 1.382(3)   | 1.363  | 1.359   | 1.363   | 1.364 | 1.372 |
| O3-C9                        | 1.415(3)   | 1.410  | 1.406   | 1.410   | 1.410 | 1.413 |
| N1-C1                        | 1.371(3)   | 1.376  | 1.371   | 1.376   | 1.374 | 1.375 |
| N1-C8                        | 1.366(3)   | 1.369  | 1.365   | 1.369   | 1.367 | 1.369 |
| O2-H                         | 1.07(4)    | 1.000  | 0.996   | 1.001   | 0.998 | 0.967 |
| C1-C0                        | 1.448(3)   | 1.459  | 1.457   | 1.459   | 1.457 | 1.461 |
| C1-C2                        | 1.367(3)   | 1.376  | 1.370   | 1.376   | 1.379 | 1.376 |
| C2-C3                        | 1.416(3)   | 1.426  | 1.421   | 1.426   | 1.424 | 1.426 |
| C3-C8                        | 1.402(3)   | 1.413  | 1.407   | 1.413   | 1.414 | 1.414 |
| C3-C4                        | 1.410(3)   | 1.413  | 1.407   | 1.413   | 1.414 | 1.413 |
| C4-C5                        | 1.365(3)   | 1.381  | 1.375   | 1.381   | 1.381 | 1.379 |
| C5-C6                        | 1.405(3)   | 1.420  | 1.415   | 1.420   | 1.421 | 1.418 |
| C6-C7                        | 1.362(3)   | 1.376  | 1.369   | 1.376   | 1.375 | 1.376 |
| C7-C8                        | 1.401(3)   | 1.404  | 1.398   | 1.404   | 1.405 | 1.404 |
| C5-O3-C9                     | 117.81(19) | 117.8  | 117.8   | 117.8   | 117.8 | 118.5 |
| C1-N1-C8                     | 108.69(19) | 108.8  | 108.8   | 108.8   | 108.4 | 108.9 |
| C0-O2-H                      | 113.2(19)  | 110.4  | 110.3   | 110.2   | 110.3 | 106.9 |
| N1-C1-C0                     | 119.8(2)   | 119.2  | 119.3   | 119.2   | 119.9 | 118.6 |
| C0-C1-C2                     | 131.1(2)   | 131.1  | 131.0   | 131.1   | 130.2 | 131.7 |
| N1-C1-C2                     | 109.06(19) | 109.7  | 109.7   | 109.7   | 110.0 | 109.8 |
| O1-C0-O2                     | 123.4(2)   | 124.3  | 124.3   | 124.2   | 123.8 | 123.0 |
| O2-C0-C1                     | 114.8(2)   | 114.8  | 114.6   | 114.8   | 114.8 | 113.3 |
| O1-C0-C1                     | 121.8(2)   | 120.9  | 121.1   | 121.0   | 121.4 | 123.8 |
| C1-C2-C3                     | 107.6(2)   | 106.7  | 106.7   | 106.7   | 106.6 | 106.6 |
| C2-C3-C8                     | 106.3(2)   | 106.9  | 106.9   | 106.9   | 106.7 | 107.0 |
| C2-C3-C4                     | 134.2(2)   | 133.1  | 133.2   | 133.1   | 133.3 | 133.1 |
| C4-C3-C8                     | 119.5(2)   | 120.0  | 120.0   | 120.0   | 120.0 | 119.9 |
| C3-C4-C5                     | 118.3(2)   | 118.1  | 118.2   | 118.1   | 118.1 | 117.8 |
| O3-C5-C4                     | 124.6(2)   | 124.7  | 124.7   | 124.7   | 124.7 | 124.1 |
| O3-C5-C6                     | 113.9(2)   | 114.2  | 114.3   | 114.2   | 114.1 | 114.1 |
| C4-C5-C6                     | 121.5(2)   | 121.1  | 121.0   | 121.6   | 121.2 | 121.8 |
| C5-C6-C7                     | 121.5(2)   | 121.6  | 121.6   | 121.6   | 121.5 | 121.1 |
| C6-C7-C8                     | 117.7(2)   | 117.7  | 117.7   | 117.7   | 117.7 | 117.7 |
| N1-C8-C3                     | 108.34(19) | 107.9  | 107.9   | 107.9   | 108.4 | 107.8 |
| N1-C8-C7                     | 130.1(2)   | 130.6  | 130.6   | 130.6   | 130.2 | 130.5 |
| C3-C8-C7                     | 121.6(2)   | 121.5  | 121.5   | 121.5   | 121.4 | 121.7 |

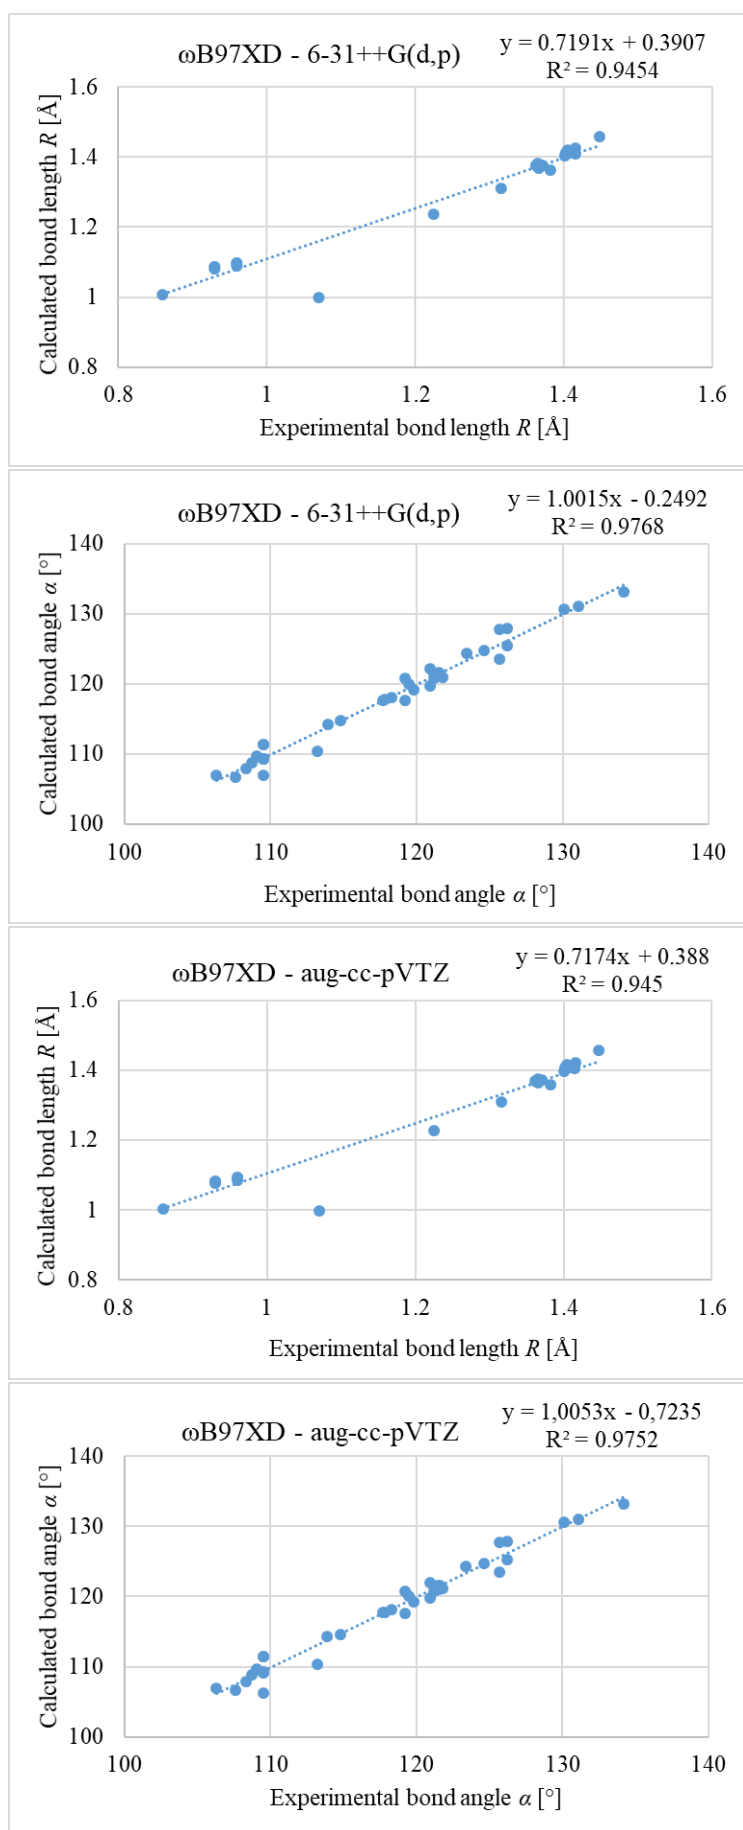

**Figure S1.** Correlations between the experimental and theoretical geometrical parameters calculated for dimer using the  $\omega$ B97X-D method and two basis sets: 6-31++G(d,p) and aug-cc-pVTZ.

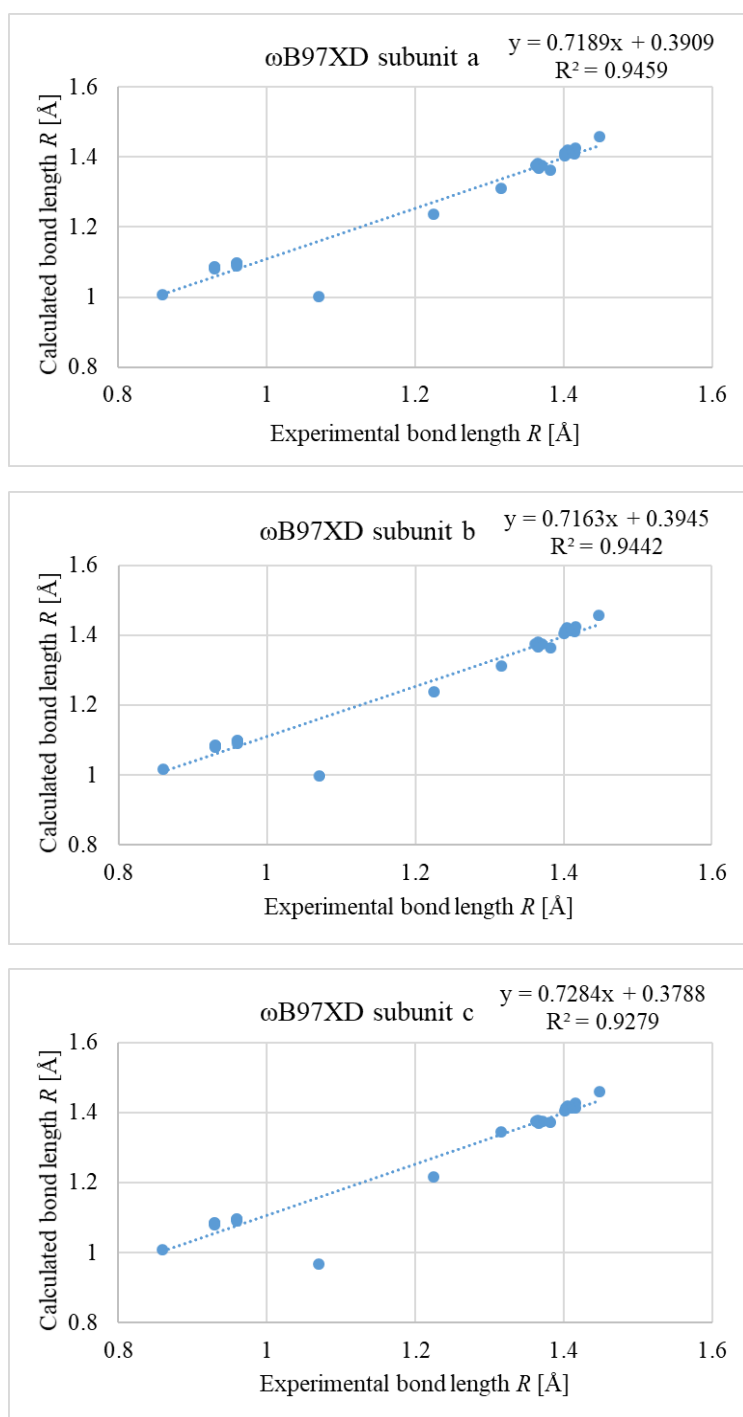

**Figure S2.** Correlations between the experimental and theoretical bond lengths calculated for trimer using the  $\omega$ B97XD method and the 6-31++G(d,p) basis set.

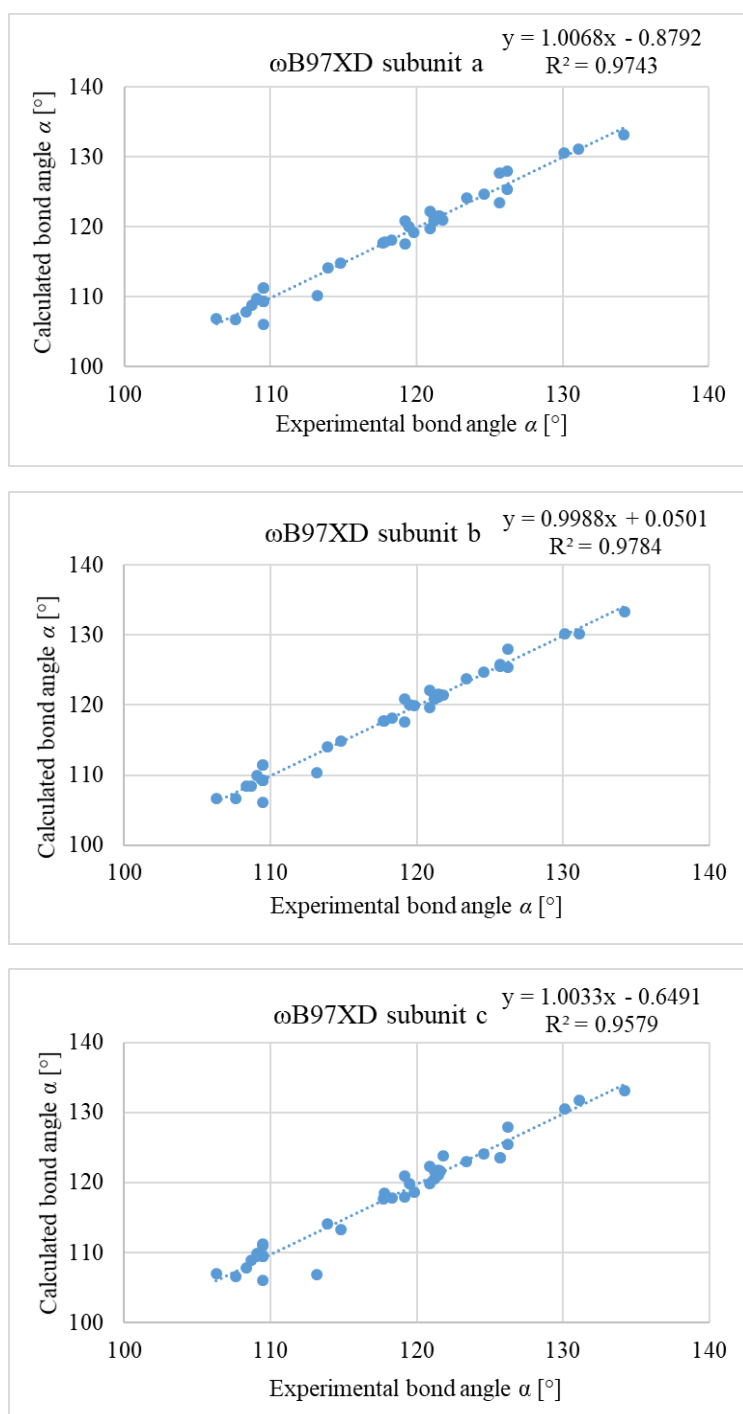

**Figure S3.** Correlations between the experimental and theoretical bond angles calculated for trimer using the  $\omega$ B97XD method and the 6-31++G(d,p) basis set.

**Table S3.** Experimental (FT-IR) and theoretical wavenumbers ( $\tilde{\nu}^a$ ,  $\text{cm}^{-1}$ ), and infrared intensities ( $A^{\text{IR}}$ ,  $\text{km}\cdot\text{mol}^{-1}$ ) calculated for trimer using the  $\omega\text{B97X-D}$  method and the 6-31++G(d,p) basis set with band assignments.

| FT-IR   | $\tilde{\nu}^a$ | $A^{\text{IR}}$ | Assignments <sup>b</sup>                                                          |
|---------|-----------------|-----------------|-----------------------------------------------------------------------------------|
| 3342 s  | 3655            | 153             | $\nu(\text{O2H})\text{c}$                                                         |
|         | 3522            | 116             | $\nu(\text{N1H})\text{a}$                                                         |
|         | 3519            | 118             | $\nu(\text{N1H})\text{c}$                                                         |
|         | 3373            | 952             | $\nu(\text{N1H})\text{b}$                                                         |
|         | 3124            | 0.17            | $\nu(\text{C2H})\text{a}$                                                         |
|         | 3124            | 0.36            | $\nu(\text{C2H})\text{c}$                                                         |
| 3082 m  | 3123            | 0.01            | $\nu(\text{C2H})\text{b}$                                                         |
|         | 3077            | 1930            | $\nu(\text{C4H})\text{a,b}$                                                       |
|         | 3076            | 526             | $\nu(\text{C4H})\text{b,a}$                                                       |
|         | 3076            | 16              | $\nu(\text{C4H})\text{c}$                                                         |
|         | 3075            | 3552            | $\nu(\text{O2H})\text{b,a}$                                                       |
|         | 3072            | 52              | $\nu(\text{C6H})\text{a}; \nu(\text{C7H})\text{a}$                                |
| 3067 m  | 3072            | 257             | $\nu(\text{C6H})\text{b}; \nu(\text{C7H})\text{b}$                                |
|         | 3066            | 703             | $\nu(\text{C6H})\text{c}; \nu(\text{C7H})\text{c}$                                |
|         | 3055            | 12              | $\nu(\text{C7H})\text{b}; \nu(\text{C6H})\text{b}$                                |
| 3033 m  | 3054            | 79              | $\nu(\text{C7H})\text{c}; \nu(\text{C6H})\text{c}$                                |
|         | 3053            | 20              | $\nu(\text{C7H})\text{a}; \nu(\text{C6H})\text{a}$                                |
| 2993 m  | 3012            | 33              | $\nu(\text{Me})\text{a}$                                                          |
|         | 3011            | 36              | $\nu(\text{Me})\text{b}$                                                          |
|         | 3009            | 17              | $\nu(\text{Me})\text{c}$                                                          |
| 2963 m  | 2973            | 627             | $\nu(\text{O2H})\text{a,b}$                                                       |
| 2940 m  | 2947            | 30              | $\nu(\text{Me})\text{c}$                                                          |
|         | 2935            | 40              | $\nu(\text{Me})\text{a}$                                                          |
|         | 2934            | 40              | $\nu(\text{Me})\text{b}$                                                          |
| 2835 m  | 2876            | 43              | $\nu(\text{Me})\text{c}$                                                          |
|         | 2869            | 54              | $\nu(\text{Me})\text{a}$                                                          |
|         | 2869            | 69              | $\nu(\text{Me})\text{b}$                                                          |
|         | 1739            | 595             | $\nu(\text{C0O1})\text{c}$                                                        |
| 1676 vs | 1687            | 1650            | $\nu(\text{C0O1})\text{a,b}$                                                      |
|         | 1652            | 34              | $\nu(\text{C0O1})\text{a,b}$                                                      |
|         | 1635            | 89              | $\nu(\text{R6})\text{c}$                                                          |
| 1629 m  | 1635            | 109             | $\nu(\text{R6})\text{a,b}$                                                        |
|         | 1633            | 3               | $\nu(\text{R6})\text{a,b}$                                                        |
|         | 1585            | 6               | $\nu(\text{R6})\text{c}$                                                          |
| 1587 w  | 1583            | 25              | $\nu(\text{R6})\text{a,b}$                                                        |
|         | 1582            | 0.24            | $\nu(\text{R6})\text{a,b}$                                                        |
| 1542 vs | 1537            | 819             | $\nu(\text{R5/R6})\text{a}; \nu(\text{C1C0})\text{a}$                             |
|         | 1536            | 259             | $\nu(\text{R5/R6})\text{c}; \nu(\text{C1C0})\text{c}$                             |
|         | 1529            | 70              | $\nu(\text{R5})\text{b}; \nu(\text{C1C0})\text{b}$                                |
| 1497 w  | 1491            | 17              | $\nu(\text{R5/R6})\text{b}; \delta(\text{N1H})\text{b}$                           |
|         | 1489            | 23              | $\nu(\text{R5/R6})\text{a}; \nu(\text{C1C0})\text{a}; \delta(\text{N1H})\text{a}$ |
|         | 1486            | 6               | $\nu(\text{R5/R6})\text{c}; \delta(\text{N1H})\text{c}; \nu(\text{C1C0})\text{c}$ |
|         | 1455            | 10              | $\nu(\text{R5})\text{a,b}; \delta(\text{O2H})\text{a,b}$                          |
|         | 1452            | 36              | $\delta(\text{Me})\text{c}$                                                       |
| 1472 w  | 1451            | 39              | $\delta(\text{Me})\text{b,c}$                                                     |



| FT-IR   | $\tilde{\nu}^a$ | $A^{IR}$ | Assignments <sup>b</sup>                                                                  |
|---------|-----------------|----------|-------------------------------------------------------------------------------------------|
| 1460 m  | 1451            | 28       | $\delta(\text{Me})a$ ; $\nu(\text{R5/R6})a$                                               |
|         | 1447            | 84       | $\delta(\text{Me})b,c$                                                                    |
|         | 1446            | 477      | $\delta(\text{Me})a,b,c$                                                                  |
|         | 1443            | 17       | $\delta(\text{Me})a,b$                                                                    |
| 1452 m  | 1435            | 45       | $\delta(\text{Me})c$                                                                      |
|         | 1434            | 10       | $\delta(\text{Me})a$                                                                      |
|         | 1434            | 9        | $\delta(\text{Me})b$                                                                      |
| 1434 s  | 1431            | 238      | $\nu(\text{R5/R6})a,b$                                                                    |
|         | 1426            | 25       | $\nu(\text{R5/R6})c$ ; $\delta(\text{Me})c$                                               |
|         | 1422            | 24       | $\delta(\text{Me})b$                                                                      |
|         | 1419            | 80       | $\delta(\text{Me})a$                                                                      |
| 1375 w  | 1416            | 66       | $\delta(\text{Me})c$                                                                      |
|         | 1413            | 5        | $\delta(\text{Me})b$                                                                      |
|         | 1408            | 15       | $\nu(\text{R5})a$ ; $\delta(\text{O2H})a$ , $\delta(\text{N1H})a$                         |
|         | 1376            | 80       | $\nu(\text{C0O2})c$ ; $\nu(\text{R5/R6})c$ ; $\nu(\text{C1C0})c$                          |
|         | 1363            | 1        | $\nu(\text{R6})b$                                                                         |
|         | 1358            | 11       | $\nu(\text{R6})a$                                                                         |
|         | 1349            | 42       | $\nu(\text{R5/R6})c$                                                                      |
|         | 1344            | 0.26     | $\nu(\text{R5})a,b$ ; $\delta(\text{O2H})a,b$                                             |
|         | 1339            | 241      | $\nu(\text{R5})a,b$ ; $\delta(\text{O2H})a,b$                                             |
|         | 1295            | 8        | $\nu(\text{R5/R6})c$ ; $\delta(\text{O2H})c$                                              |
| 1300 w  | 1282            | 50       | $\delta(\text{R5/R6})b$                                                                   |
|         | 1281            | 6        | $\delta(\text{R5/R6})a$                                                                   |
|         | 1272            | 216      | $\delta(\text{O2H})c$ ; $\nu(\text{R5/R6})c$ ; $\nu(\text{O3C9})c$                        |
| 1259 vs | 1256            | 193      | $\nu(\text{C0O2})b$ ; $\nu(\text{R5/R6})b$ ; $\delta(\text{C0O2})b$                       |
|         | 1252            | 1344     | $\nu(\text{C0O2})a$ ; $\nu(\text{R5/R6})a$                                                |
|         | 1227            | 243      | $\nu(\text{C5O3})b$ ; $\delta(\text{N1H})b$ ; $\nu(\text{O3C9})b$ ; $\delta(\text{C4H})b$ |
|         | 1218            | 155      | $\delta(\text{C4H})c$                                                                     |
| 1227 vs | 1217            | 169      | $\delta(\text{C4H})a$                                                                     |
|         | 1207            | 44       | $\delta(\text{C4H})b$ ; $\delta(\text{C7H})b$                                             |
|         | 1206            | 38       | $\nu(\text{R5/R6})a$ ; $\delta(\text{C7H})a$                                              |
| 1220 vs | 1205            | 63       | $\nu(\text{C5O3})c$ ; $\delta(\text{O3C9})c$ ; $\delta(\text{R5/R6})c$                    |
| 1200 m  | 1191            | 39       | $\delta(\text{N1H})b$ ; $\nu(\text{R5/R6})b$ ; $\nu(\text{O3C5})b$ ; $\delta(\text{Me})b$ |
|         | 1180            | 178      | $\delta(\text{N1H})c$ ; $\nu(\text{R5/R6})c$ ; $\delta(\text{Me})c$                       |
|         | 1171            | 27       | $\delta(\text{N1H})a$ ; $\nu(\text{R5/R6})a$ ; $\delta(\text{Me})a$                       |
| 1165 s  | 1161            | 108      | $\delta(\text{Me})c$ ; $\nu(\text{O3C9})c$                                                |
|         | 1156            | 27       | $\delta(\text{Me})b$ ; $\nu(\text{O3C9})b$                                                |
|         | 1154            | 36       | $\delta(\text{Me})a$ ; $\nu(\text{R5/R6})a$                                               |
|         | 1138            | 424      | $\delta(\text{O2H})c$ ; $\nu(\text{C0O2})c$ ; $\nu(\text{R5})c$                           |
| 1132 s  | 1129            | 1        | $\delta(\text{Me})c$                                                                      |
|         | 1128            | 1        | $\delta(\text{Me})b$                                                                      |
|         | 1128            | 1        | $\delta(\text{Me})a$                                                                      |
|         | 1121            | 51       | $\delta(\text{C6H})c$ ; $\delta(\text{C7H})c$                                             |
|         | 1104            | 20       | $\delta(\text{C6H})a$ ; $\delta(\text{C7H})a$                                             |
| 1101 w  | 1102            | 23       | $\delta(\text{C6H})b$ ; $\delta(\text{C7H})b$                                             |
|         | 1094            | 22       | $\delta(\text{C2H})b$ ; $\delta(\text{C4H})b$                                             |
|         | 1089            | 76       | $\delta(\text{C2H})a$                                                                     |
|         | 1087            | 16       | $\delta(\text{C2H})c$                                                                     |

| FT-IR     | $\tilde{\nu}^a$ | $A^{IR}$ | Assignments <sup>b</sup>                                                 |
|-----------|-----------------|----------|--------------------------------------------------------------------------|
| 1036 s    | 1044            | 32       | $\nu(\text{O3C9})b$ , $\nu(\text{R6})b$                                  |
|           | 1044            | 32       | $\nu(\text{O3C9})a$ , $\nu(\text{R6})a$                                  |
|           | 1043            | 46       | $\nu(\text{O3C9})c$ , $\nu(\text{R6})c$                                  |
|           | 963             | 9        | $\nu(\text{R5})a$ ; $\delta(\text{R5})a$ ; $\delta(\text{C1C0})a$        |
| 978 w     | 963             | 35       | $\nu(\text{R5})b$ ; $\delta(\text{R5})b$                                 |
|           | 962             | 138      | $\gamma(\text{O2H})a,b$                                                  |
|           | 955             | 2        | $\nu(\text{R5})c$ ; $\delta(\text{R5})c$ ; $\nu(\text{C1C0})c$           |
|           | 963             | 0.49     | $\tau(\text{R5/R6})c$                                                    |
| 940 w     | 946             | 0.22     | $\delta(\text{R6})a,b$ ; $\nu(\text{R6})a,b$                             |
|           | 946             | 6        | $\delta(\text{R6})a,b$ ; $\nu(\text{R6})a,b$                             |
|           | 945             | 8        | $\delta(\text{R6})c$ ; $\nu(\text{R6})c$ ; $\nu(\text{C5O3})c$           |
|           | 942             | 1        | $\gamma(\text{C6H})b$ ; $\gamma(\text{C7H})b$                            |
|           | 942             | 0.0003   | $\gamma(\text{C6H})a$ ; $\gamma(\text{C7H})a$                            |
|           | 931             | 7        | $\gamma(\text{O2H})a,b$                                                  |
| 838 m     | 855             | 55       | $\gamma(\text{C6H})c$ ; $\gamma(\text{C4H})c$                            |
|           | 853             | 40       | $\gamma(\text{C6H})b$ ; $\gamma(\text{C4H})b$                            |
|           | 852             | 38       | $\gamma(\text{C6H})a$ ; $\gamma(\text{C4H})a$                            |
|           | 844             | 20       | $\delta(\text{R5/R6})b$                                                  |
| 825 s     | 838             | 10       | $\delta(\text{R5/R6})a$                                                  |
|           | 836             | 17       | $\delta(\text{R5/R6})c$                                                  |
|           | 822             | 22       | $\gamma(\text{C6H})c$ ; $\gamma(\text{C7H})c$                            |
|           | 821             | 1        | $\gamma(\text{C2H})a$ ; $\gamma(\text{C4H})a$                            |
|           | 820             | 3        | $\gamma(\text{C2H})b$ ; $\gamma(\text{C4H})b$                            |
|           | 819             | 9        | $\gamma(\text{C2H})c$ ; $\gamma(\text{C4H})c$                            |
|           | 806             | 45       | $\gamma(\text{C6H})b$ ; $\gamma(\text{C7H})b$                            |
|           | 806             | 17       | $\gamma(\text{C6H})a$ ; $\gamma(\text{C7H})a$                            |
|           | 771             | 29       | $\gamma(\text{C2H})b$                                                    |
|           | 766             | 28       | $\gamma(\text{C2H})a$                                                    |
| 763 s     | 766             | 32       | $\gamma(\text{C2H})c$                                                    |
|           | 764             | 4        | $\delta(\text{COO})a,b$ ; $\nu(\text{C5O3})a,b$                          |
|           | 760             | 1        | $\nu(\text{C5O3})a,b$ ; $\delta(\text{R5/R6})a,b$                        |
|           | 756             | 14       | $\delta(\text{R5/R6})c$ ; $\nu(\text{C5O3})c$                            |
| 732 s     | 738             | 43       | $\delta(\text{R5/R6})a,b$ ; $\delta(\text{COO})a,b$                      |
|           | 735             | 19       | $\tau(\text{R5/R6})b,c$ ; $\gamma(\text{C2H})c$                          |
|           | 735             | 28       | $\tau(\text{R5/R6})c$ ; $\gamma(\text{C2H})c$                            |
|           | 733             | 10       | $\tau(\text{R5/R6})a$ ; $\gamma(\text{C0C1})a$ ; $\gamma(\text{C5O3})a$  |
|           | 722             | 1        | $\delta(\text{COO})a,b$                                                  |
|           | 698             | 19       | $\gamma(\text{N1H})b$                                                    |
| 640 m, br | 686             | 33       | $\delta(\text{COO})c$                                                    |
|           | 630             | 9        | $\tau(\text{R5/R6})c$ ; $\gamma(\text{CCO})c$                            |
|           | 618             | 11       | $\delta(\text{R5/R6})b$ ; $\delta(\text{CCO})b$                          |
| 618 m     | 615             | 2        | $\tau(\text{R5/R6})b$                                                    |
|           | 613             | 1        | $\tau(\text{R5/R6})c$ ; $\gamma(\text{O2H})c$                            |
|           | 613             | 0.34     | $\tau(\text{R5/R6})a$                                                    |
|           | 612             | 1        | $\tau(\text{R5/R6})c$ ; $\gamma(\text{C5O3})c$ ; $\gamma(\text{COO})c$   |
| 607 m     | 604             | 16       | $\delta(\text{R5/R6})c$ ; $\delta(\text{C5O3})c$ ; $\delta(\text{COO})c$ |
|           | 599             | 18       | $\tau(\text{R5/R6})a$                                                    |
|           | 582             | 19       | $\tau(\text{R5/R6})b$                                                    |

| FT-IR | $\tilde{\nu}^a$ | $A^{IR}$ | Assignments <sup>b</sup>                                                                                                                 |
|-------|-----------------|----------|------------------------------------------------------------------------------------------------------------------------------------------|
| 561 m | 573             | 95       | $\delta(\text{COO})_{a,b}$                                                                                                               |
|       | 562             | 1        | $\delta(\text{COO})_{a,b}$                                                                                                               |
|       | 552             | 4        | $\delta(\text{COO})_c$                                                                                                                   |
|       | 548             | 134      | $\gamma(\text{O2H})_c$                                                                                                                   |
| 536 m | 535             | 25       | $\delta(\text{C5O3C9})_c$ ;                                                                                                              |
|       | 533             | 6        | $\delta(\text{C5O3C9})_{a,b}$                                                                                                            |
|       | 531             | 40       | $\delta(\text{C5O3C9})_{a,b}$                                                                                                            |
|       | 479             | 38       | $\gamma(\text{N1H})_c$                                                                                                                   |
|       | 474             | 3        | $\delta(\text{C5O3})_{a,b}$                                                                                                              |
|       | 472             | 61       | $\gamma(\text{N1H})_a$                                                                                                                   |
| 473 w | 468             | 0.06     | $\delta(\text{C5O3})_{a,b}$                                                                                                              |
|       | 458             | 20       | $\delta(\text{C5O3})_c$                                                                                                                  |
| 430 m | 433             | 5        | $\tau(\text{R5/R6})_b$                                                                                                                   |
|       | 430             | 2        | $\tau(\text{R5/R6})_c$                                                                                                                   |
|       | 429             | 1        | $\tau(\text{R5/R6})_a$                                                                                                                   |
|       | 393             | 9        | $\delta(\text{C5O3C9})_b$ ; $\delta(\text{R5/R6})_b$ ; $\nu(\text{H}\cdots\text{O1})_{a,b}$                                              |
|       | 388             | 43       | $\delta(\text{C5O3C9})_a$ ; $\delta(\text{R5/R6})_a$ ; $\nu(\text{H}\cdots\text{O1})_{a,b}$                                              |
|       | 379             | 0.21     | $\tau(\text{R5/R6})_{b,c}$ ; $\gamma(\text{C5O3})_{b,c}$ ; $\gamma(\text{O2H})_c$                                                        |
|       | 378             | 1        | $\tau(\text{R5/R6})_{b,c}$ ; $\gamma(\text{C5O3})_{b,c}$ ; $\gamma(\text{H}\cdots\text{O3})_{b,c}$                                       |
|       | 377             | 0.01     | $\tau(\text{R5/R6})_a$ ; $\gamma(\text{C5O3})_a$ ; $\gamma(\text{H}\cdots\text{O3})_{b,c}$                                               |
|       | 370             | 1        | $\delta(\text{C5O3C9})_c$ ; $\delta(\text{R5/R6})_c$ ; $\delta(\text{CCO})_c$                                                            |
|       | 345             | 0.21     | $\delta(\text{CCO})_{a,b}$ ; $\delta(\text{R5/R6})_{a,b}$                                                                                |
|       | 327             | 24       | $\delta(\text{COO})_{a,b}$                                                                                                               |
|       | 320             | 0.36     | $\delta(\text{CCO})_c$ ; $\delta(\text{COO})_c$                                                                                          |
|       | 281             | 0.24     | $\gamma(\text{C5O3})_c$                                                                                                                  |
|       | 271             | 0.07     | $\tau(\text{R5/R6})_{a,b}$ ; $\gamma(\text{C5O3})_{a,b}$                                                                                 |
|       | 270             | 1        | $\tau(\text{R5/R6})_{a,b}$ ; $\gamma(\text{C5O3})_{a,b}$                                                                                 |
|       | 256             | 1        | $\tau(\text{R5/R6})_c$ ; $\tau(\text{C5O3})_c$ ; $\gamma(\text{Me})_c$                                                                   |
|       | 249             | 71       | $\tau(\text{R5/R6})_b$ ; $\delta(\text{C5O3C9})_b$ ; $\gamma(\text{C1C0})_c$                                                             |
|       | 247             | 15       | $\tau(\text{R5/R6})_b$ ; $\delta(\text{C5O3C9})_b$                                                                                       |
|       | 246             | 6        | $\delta(\text{C5O3C9})_a$                                                                                                                |
|       | 239             | 7        | $\delta(\text{H}\cdots\text{O1})_{a,b}$                                                                                                  |
|       | 220             | 8        | $\delta(\text{C5O3C9})_c$                                                                                                                |
|       | 189             | 0.26     | $\tau(\text{R5/R6})_b$ ; $\gamma(\text{C5O3})_b$                                                                                         |
|       | 184             | 1        | $\tau(\text{R5/R6})_a$ ; $\gamma(\text{C5O3})_a$                                                                                         |
|       | 183             | 1        | $\delta(\text{H}\cdots\text{O1})_{a,b}$                                                                                                  |
|       | 181             | 2        | $\tau(\text{R5/R6})_c$                                                                                                                   |
|       | 168             | 9        | $\delta(\text{H}\cdots\text{O1})_{a,b}$                                                                                                  |
|       | 123             | 2        | $\delta(\text{H}\cdots\text{O3})_{b,c}$                                                                                                  |
|       | 113             | 0.12     | $\gamma(\text{C5O3})_{a,b}$ ; $\tau(\text{R6/R5})_{a,b}$                                                                                 |
|       | 103             | 7        | $\gamma(\text{C5O3})_c$ ; $\nu(\text{H}\cdots\text{O3})_{b,c}$ ; $\tau(\text{R5/R6})_{b,c}$                                              |
|       | 101             | 3        | $\gamma(\text{C5O3})_c$ ; $\delta(\text{H}\cdots\text{O3})_{b,c}$ ; $\tau(\text{R5/R6})_{b,c}$ ; $\gamma(\text{H}\cdots\text{O3})_{b,c}$ |
|       | 96              | 0.16     | $\tau(\text{R6/R5})_{a,b}$                                                                                                               |
|       | 93              | 2        | $\tau(\text{R6/R5})_{a,b}$                                                                                                               |
|       | 91              | 1        | $\nu(\text{H}\cdots\text{O1})_{a,b}$ ; $\tau(\text{R6/R5})_{a,b}$                                                                        |
|       | 88              | 1        | $\tau(\text{R5/R6})_c$                                                                                                                   |
|       | 81              | 0.36     | $\nu(\text{H}\cdots\text{O3})_{b,c}$ ; $\delta(\text{H}\cdots\text{O3})_{b,c}$                                                           |
|       | 76              | 0.18     | $\tau(\text{R5/R6})_{a,b}$                                                                                                               |

| FT-IR | $\tilde{\nu}$ <sup>a</sup> | A <sup>IR</sup> | Assignments <sup>b</sup>                                                                                                   |
|-------|----------------------------|-----------------|----------------------------------------------------------------------------------------------------------------------------|
|       | 71                         | 0.31            | $\gamma(\text{C5O3})\text{a}$ ; $\tau(\text{R5/R6})\text{a}$                                                               |
|       | 68                         | 1               | $\tau(\text{R6/R5})\text{c}$ ; $\delta(\text{H}\cdots\text{O3})\text{b,c}$ ; $\gamma(\text{C5O3})\text{b}$                 |
|       | 52                         | 0.3             | $\nu(\text{H}\cdots\text{O3})\text{b,c}$ ; $\gamma(\text{COO})\text{b}$                                                    |
|       | 43                         | 1               | $\delta(\text{H}\cdots\text{O3})\text{b,c}$ ; $\gamma(\text{COO})\text{b}$                                                 |
|       | 38                         | 0.25            | $\delta(\text{H}\cdots\text{O3})\text{b,c}$ ; $\delta(\text{R5})\text{b}$                                                  |
|       | 35                         | 0.12            | $\tau(\text{R5})\text{a,b}$ ; $\gamma(\text{C1C0})\text{a}$ ; $\delta(\text{H}\cdots\text{O3})\text{b,c}$                  |
|       | 25                         | 0.25            | $\delta(\text{H}\cdots\text{O3})\text{b,c}$ ; $\gamma(\text{COO})\text{b}$                                                 |
|       | 22                         | 0.17            | $\delta(\text{H}\cdots\text{O3})\text{b,c}$ ; $\gamma(\text{CCO})\text{a,b}$ ; $\delta(\text{H}\cdots\text{O1})\text{a,b}$ |
|       | 17                         | 0.05            | $\delta(\text{H}\cdots\text{O3})\text{b,c}$ ; $\gamma(\text{C5O3})\text{c}$                                                |
|       | 9                          | 0.02            | $\gamma(\text{COO})\text{b}$ ; $\delta(\text{H}\cdots\text{O3})\text{b,c}$                                                 |
|       | 7                          | 0.23            | $\gamma(\text{COO})\text{b}$ ; $\delta(\text{H}\cdots\text{O3})\text{b,c}$                                                 |
|       | 2                          | 0.01            | $\tau(\text{R5})\text{b}$                                                                                                  |

Abbreviations: a, b, c, units in the trimer; br, broad; m, medium; s, strong; v, very; w, weak;  $\nu$ , stretching;  $\delta$ , in-plane bending;  $\gamma$ , out-of-plane bending;  $\tau$ , torsion; Me, methyl group; 5R, five-membered ring; 6R, six-membered ring. <sup>a</sup> The calculated frequencies were scaled, as shown in Section 3.4. <sup>b</sup> Assignment from PED calculated by FCART06 and verified by Chemcraft program.

**Table S4.** Selected experimental geometrical parameters, including bond lengths [Å] and bond angles [°], with e.s.d. in parentheses, observed in MI2CA polymorph 1 (this work).

|              |          |              |          |
|--------------|----------|--------------|----------|
| O1A-C0A      | 1.224(2) | O1B-C0B      | 1.221(2) |
| O2A-C0A      | 1.319(2) | O2B-C0B      | 1.32(2)  |
| O3A-C5A      | 1.375(2) | O3B-C5B      | 1.373(2) |
| O3A-C9A      | 1.419(2) | O3B-C9B      | 1.418(2) |
| N1A-C1A      | 1.379(2) | N1B-C1B      | 1.375(2) |
| N1A-C8A      | 1.372(2) | N1B-C8B      | 1.376(2) |
| O2A-HO2A     | 0.92(2)  | O2B-HO2B     | 0.91(2)  |
| C0A-C1A      | 1.456(2) | C0B-C1B      | 1.457(2) |
| C1A-C2A      | 1.369(2) | C1B-C2B      | 1.37(2)  |
| C2A-C3A      | 1.414(2) | C2B-C3B      | 1.418(2) |
| C3A-C8A      | 1.408(2) | C3B-C8B      | 1.404(2) |
| C3A-C4A      | 1.415(2) | C3B-C4B      | 1.415(2) |
| C4A-C5A      | 1.368(2) | C4B-C5B      | 1.365(2) |
| C5A-C6A      | 1.414(2) | C5B-C6B      | 1.406(3) |
| C6A-C7A      | 1.366(2) | C6B-C7B      | 1.367(3) |
| C7A-C8A      | 1.397(2) | C7B-C8B      | 1.398(3) |
| C5A-O3A-C9A  | 117.2(1) | C5B-O3B-C9B  | 117.8(1) |
| C1A-N1A-C8A  | 108.0(1) | C1B-N1B-C8B  | 108.2(1) |
| HO2A-O2A-C0A | 110(2)   | HO2B-O2B-C0B | 114(2)   |
| N1A-C1A-C0A  | 122.2(1) | N1B-C1B-C0B  | 122.0(1) |
| C0A-C1A-C2A  | 128.2(2) | C0B-C1B-C2B  | 128.7(2) |
| N1A-C1A-C2A  | 109.6(1) | N1B-C1B-C2B  | 109.2(1) |
| O1A-C0A-O2A  | 122.8(2) | O1B-C0B-O2B  | 122.8(2) |
| O2A-C0A-C1A  | 111.8(1) | O2B-C0B-C1B  | 111.9(1) |
| O1A-C0A-C1A  | 125.5(2) | O1B-C0B-C1B  | 125.3(2) |
| C1A-C2A-C3A  | 107.5(1) | C1B-C2B-C3B  | 107.8(1) |
| C2A-C3A-C8A  | 106.5(1) | C2B-C3B-C8B  | 106.2(1) |
| C2A-C3A-C4A  | 133.5(2) | C2B-C3B-C4B  | 133.8(2) |
| C4A-C3A-C8A  | 120.0(1) | C4B-C3B-C8B  | 120.0(1) |
| C3A-C4A-C5A  | 118.0(1) | C3B-C4B-C5B  | 118.1(2) |
| O3A-C5A-C4A  | 124.6(1) | O3B-C5B-C4B  | 125.0(2) |
| O3A-C5A-C6A  | 114.3(1) | O3B-C5B-C6B  | 113.8(2) |
| C4A-C5A-C6A  | 121.1(2) | C4B-C5B-C6B  | 121.2(2) |
| C5A-C6A-C7A  | 121.9(2) | C5B-C6B-C7B  | 121.9(2) |
| C6A-C7A-C8A  | 117.7(2) | C6B-C7B-C8B  | 117.6(2) |
| N1A-C8A-C3A  | 108.5(1) | N1B-C8B-C3B  | 108.5(1) |
| N1A-C8A-C7A  | 130.3(2) | N1B-C8B-C7B  | 130.3(2) |
| C3A-C8A-C7A  | 121.3(1) | C3B-C8B-C7B  | 121.2(2) |

The atom numbering follows the scheme shown in Figure S4.

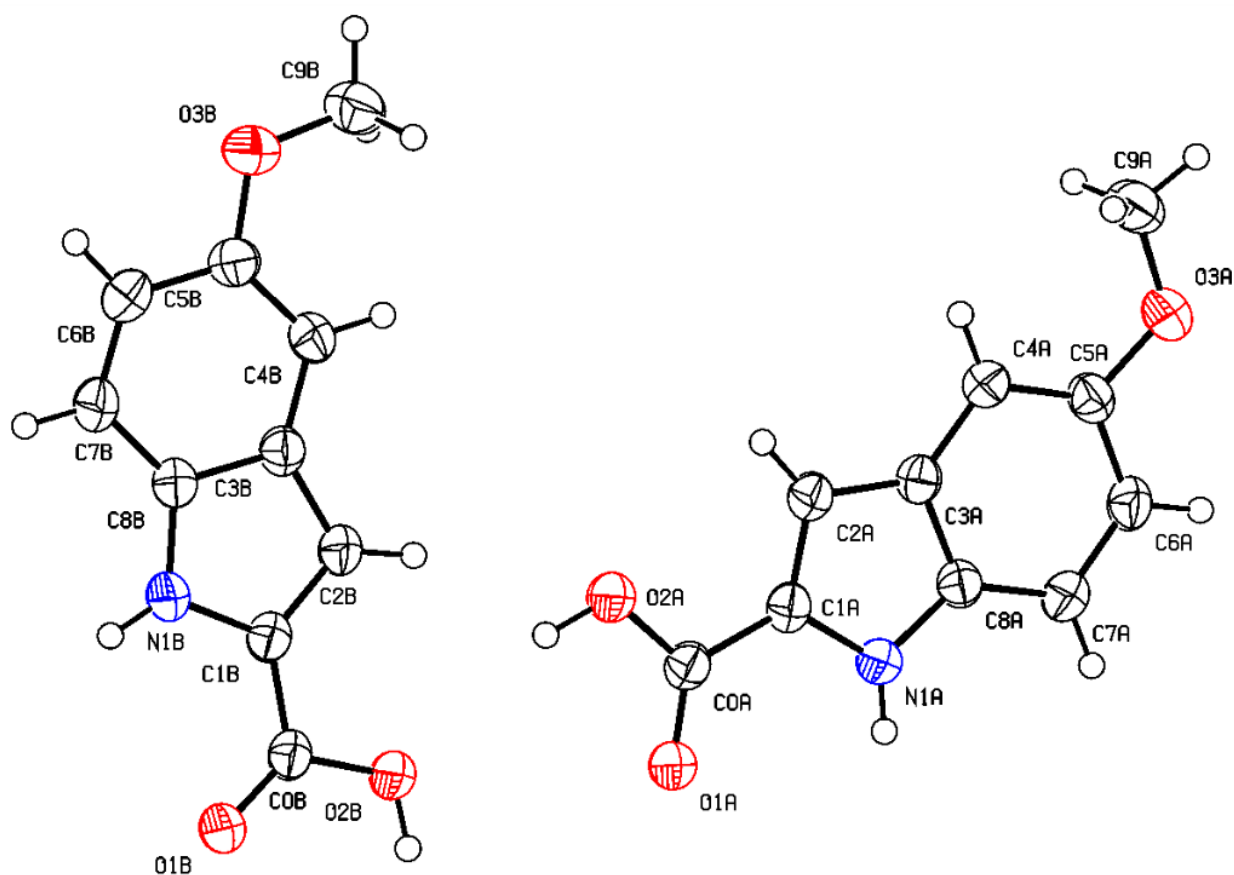

**Figure S4.** The overall view and labeling of the atoms in two independent molecules (designated as A and B) of polymorph 1 MI2CA. Displacement ellipsoids are drawn at the 50% probability level and H atoms are shown as small spheres of arbitrary radii.

**Table S5.** Experimental geometrical parameters of intermolecular interactions (distances [Å] and bond angles [°]) in MI2CA polymorph 1.

|                               | D-H     | H...A   | D...A      | D-H...A |
|-------------------------------|---------|---------|------------|---------|
| O2A-Ho2A...O1B <sup>i</sup>   | 0.92(2) | 1.85(2) | 2.7025(18) | 154(2)  |
| N1A-H1A...O1B <sup>ii</sup>   | 0.86    | 2.21    | 3.0522(18) | 165     |
| N1B-H1B...O1A <sup>i</sup>    | 0.86    | 2.22    | 3.0675(18) | 169     |
| O2B-Ho2B...O1A <sup>ii</sup>  | 0.91(2) | 1.78(3) | 2.6504(18) | 158(2)  |
| C9A-H9AA...O3B <sup>iii</sup> | 0.96    | 2.53    | 3.382(3)   | 149     |
| C7A-H7A...O2A <sup>iv</sup>   | 0.93    | 2.51    | 3.365(2)   | 153     |
| C7B-H7B...O2B <sup>v</sup>    | 0.93    | 2.41    | 3.324(2)   | 168     |

Symmetry codes: (i)  $3/2-x, 1/2-y, 1-z$ ; (ii)  $1-x, -y, 1-z$ ; (iii)  $3/2-x, -1/2+y, 3/2-z$ ; (iv)  $-1/2+x, -1/2+y, z$ ; (v)  $1/2+x, 1/2+y, z$ .
